# Supplementary material for: Targeted and selective HOMO energy control by fine regulation of molecular planarity and its effect on the interfacial charge transfer process in dye-sensitized solar cells
Source: Royal Society of Chemistry journal article supplement (doi:10.1039/c9cp00091g), 2019-01-01
Supplement: c9cp00091g1.pdf [file c9cp00091g1.pdf]

# Targeted and selective HOMO energy control by fine regulation of molecular planarity and its effect on interfacial charge transfer process in dye-sensitized solar cells

Fengyu Zhang,<sup>a</sup> Ran Wang,<sup>\*b</sup> Yajun Wang,<sup>a</sup> Xiaomin Zhang,<sup>a</sup> and Bo Liu<sup>\*a</sup>

<sup>a</sup>Hebei Key Laboratory of Organic Functional Molecules, College of Chemistry and Material Science, Hebei Normal University, No. 20, East Road of Nan Er Huan, Shijiazhuang 050024, P. R. China. E-mail: liubo@hebtu.edu.cn; Tel: +86-311-80787400;

<sup>b</sup>Graduate School, Hebei University of Science and Technology, No. 70, Yuhua East Road, Shijiazhuang, 050018, P. R. China. E-mail: wendyzhongnan@126.com

**Table S1** Optical and electrochemical properties of four dyes measured in solvent and on TiO<sub>2</sub>.

|              | $\lambda_{\max}^a$<br>/ nm | $\epsilon_{\max}^a$<br>/ M <sup>-1</sup><br>cm <sup>-1</sup> | $\lambda_{\text{PL}}^a$<br>/ nm | $\tau_{\text{solution}}^a$<br>/ ns | $\lambda_{\max}^b$<br>/ nm | Energy loss<br>/ eV | H <sup>c</sup><br>/ V vs<br>NHE | $E_{0-0}^d$<br>/ V | L <sup>e</sup><br>/ V vs<br>NHE |
|--------------|----------------------------|--------------------------------------------------------------|---------------------------------|------------------------------------|----------------------------|---------------------|---------------------------------|--------------------|---------------------------------|
| <b>CS-25</b> | 497                        | 13900                                                        | 588                             | 5.94                               | 483                        | 0.39                | 0.73                            | 2.00               | -1.27                           |
| <b>CS-26</b> | 483                        | 16400                                                        | 592                             | 5.51                               | 476                        | 0.47                | 0.79                            | 2.05               | -1.26                           |
| <b>CS-27</b> | 478                        | 18300                                                        | 612                             | 5.37                               | 472                        | 0.57                | 0.80                            | 2.07               | -1.27                           |
| <b>CS-28</b> | 471                        | 16700                                                        | 614                             | 4.14                               | 468                        | 0.61                | 0.83                            | 2.09               | -1.26                           |

<sup>a</sup> Absorption of the dyes in CHCl<sub>3</sub>/MeOH (v/v, 1/4). <sup>b</sup> Absorption of the dyes adsorbed on 3 μm TiO<sub>2</sub>. <sup>c</sup> HOMO levels of the dyes were extracted from the CVs of the dyes. H = HOMO, L = LUMO. <sup>d</sup> The  $E_{0-0}$  values were estimated from the onset wavelength of absorption spectra of dye-loaded TiO<sub>2</sub> films. <sup>e</sup> The LUMO level were calculated by followed equation: LUMO = HOMO -  $E_{0-0}$ .

**Table S2** Optical and electrochemical properties of **CS-25 - 28** calculated by Gaussian 09 program.

|              | $\lambda_{\max}^a$<br>/ nm | PL<br>/ nm | Energy loss <sup>b</sup><br>/ eV | H <sup>c</sup><br>/ V vs<br>NHE | $E_{0-0}$<br>/ V | L <sup>c</sup><br>/ V vs<br>NHE |
|--------------|----------------------------|------------|----------------------------------|---------------------------------|------------------|---------------------------------|
| <b>CS-25</b> | 522                        | 669        | 0.52                             | 0.60                            | 2.12             | -1.52                           |
| <b>CS-26</b> | 499                        | 668        | 0.63                             | 0.63                            | 2.16             | -1.53                           |
| <b>CS-27</b> | 489                        | 658        | 0.65                             | 0.68                            | 2.21             | -1.53                           |
| <b>CS-28</b> | 483                        | 650        | 0.66                             | 0.70                            | 2.23             | -1.53                           |

<sup>a</sup> The maximum absorption wavelengths were obtained by TD-DFT calculations (MPWPW91/6-311G (d,p)) at the optimized geometries of ground states, which was simulated at B3LYP/6-311G (d,p) level. H = HOMO, L = LUMO. <sup>b</sup> The energy loss is calculated from the energy difference between absorption peak and photoluminescence peak. <sup>c</sup> The HOMO and LUMO levels were simulated by DFT calculations at B3LYP/6-311G (d,p) level at the optimized geometries of ground states.

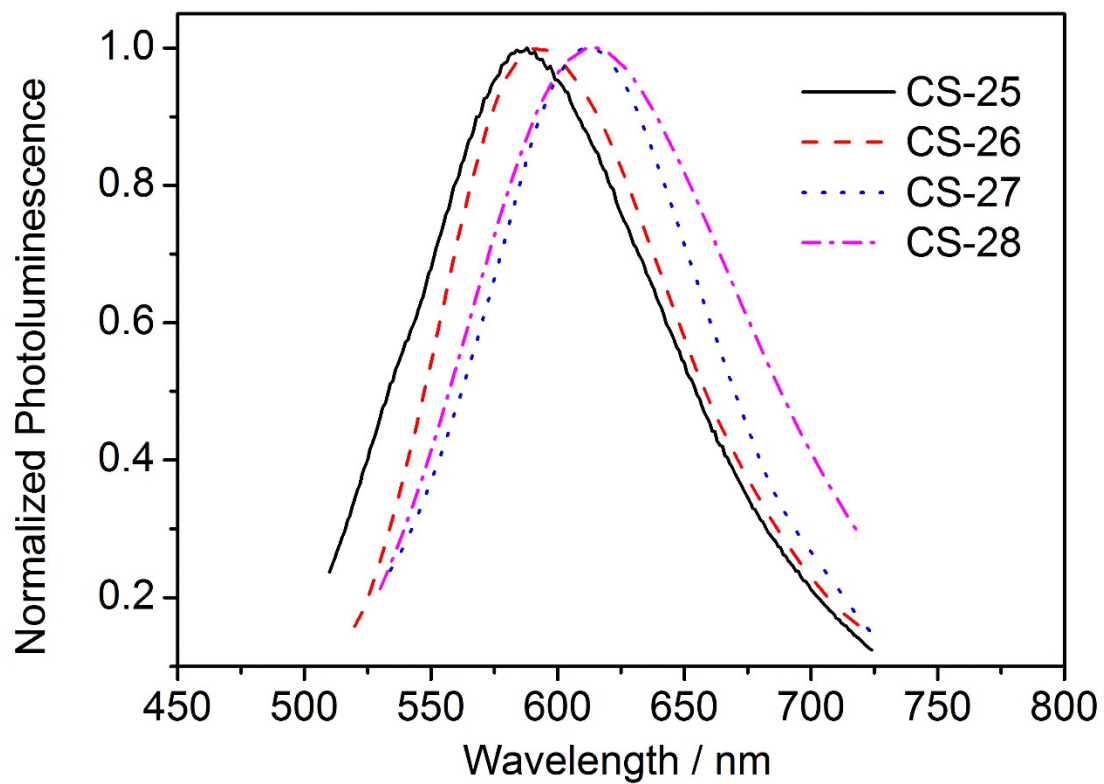

**Fig. S1.** Normalized photoluminescence spectra of CS-25 - 28 measured in CHCl<sub>3</sub>/MeOH (v/v, 1/4).

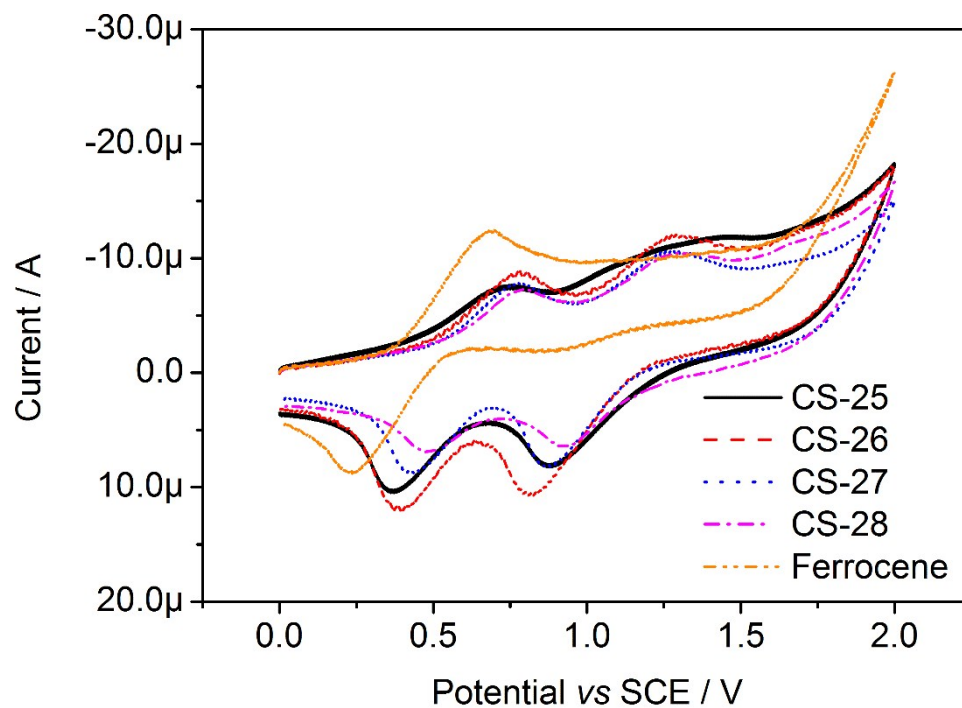

**Fig. S2.** Cyclic voltammograms of **CS-25 - 28** in  $\text{CH}_3\text{CN}$ . A dye-loaded  $\text{TiO}_2$  electrode was used as the working electrode and a Pt wire was used as the counter electrode with a SCE reference electrode, while 0.1 M tetrabutylammonium hexafluorophosphoric was used as the supporting electrolyte. After the measurement, ferrocene was added as the external reference for calibration (0.63 V vs NHE).

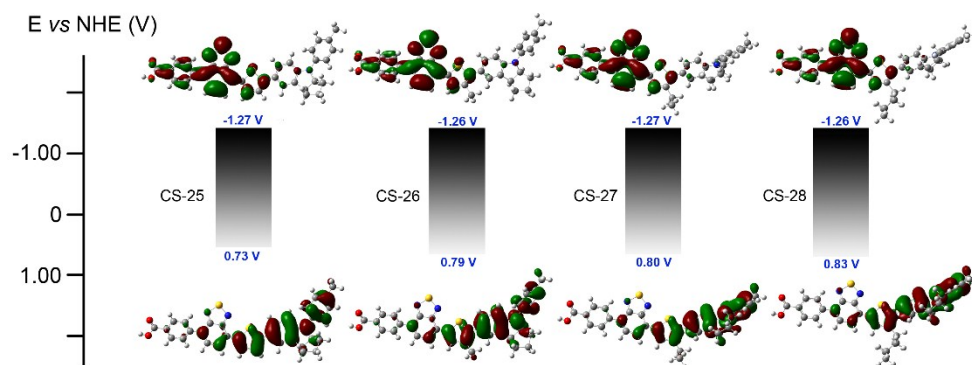

**Fig. S3** Optimized geometries of the ground singlet states and first equilibrium excited singlet states of CS-25 - 28, as well as their HOMOs and LUMOs with their experimental values.

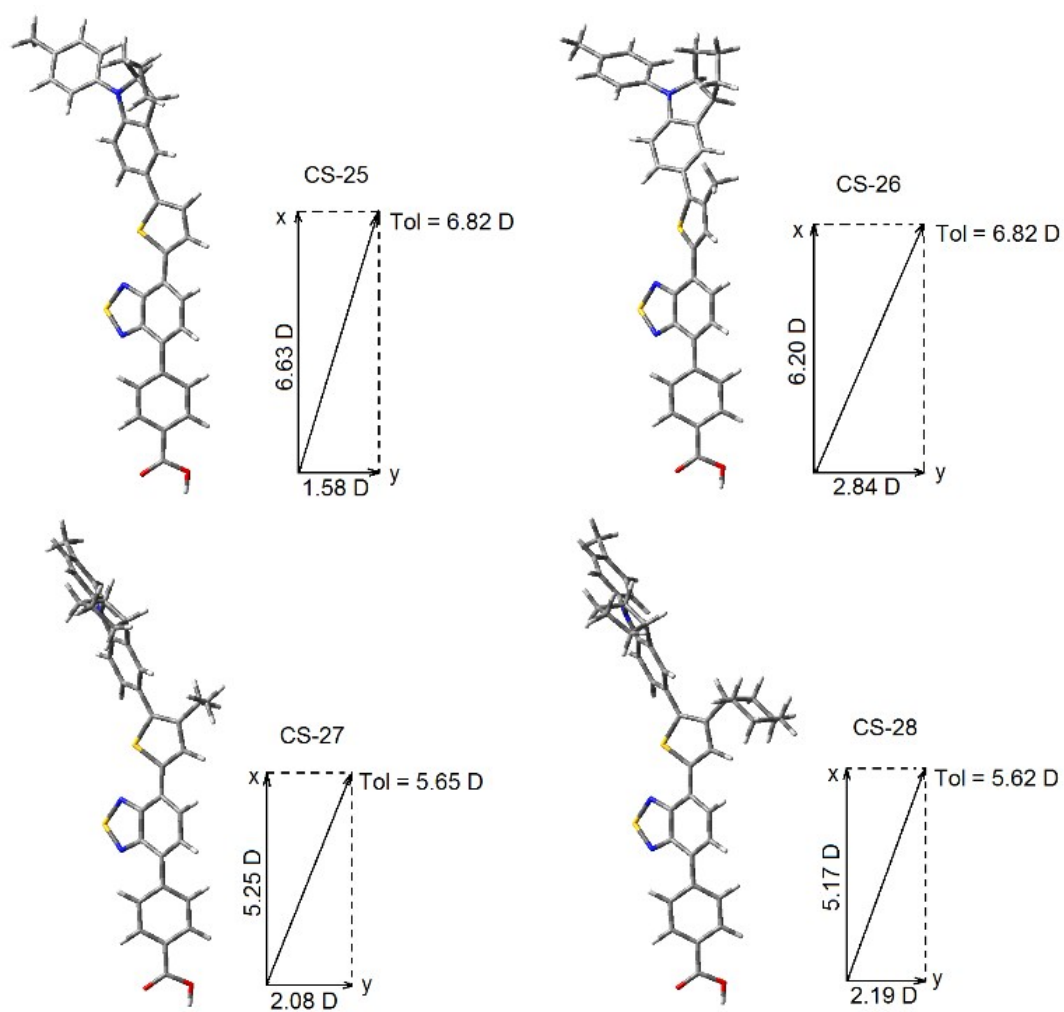

**Fig. S4** The vertical dipole moments of **CS-25 - 28** calculated at their optimized geometries of the ground singlet states.
